# Supplementary material for: Development and Pilot Testing of Standardized Food Images for Studying Eating Behaviors in Children
Source: Front Psychol. 2020 Jul 21;11:1729. doi: 10.3389/fpsyg.2020.01729 (PMC7385190; doi:10.3389/fpsyg.2020.01729)
Supplement: Supplementary file 1 [file Data_Sheet_1.CSV]

name	is_food	img_version	img_type	img_size	image_pixels_1	image_pixels_2	red	green	blue	objectsize	intensity	intensity_norm	sd	complexity	complexity_norm	meanpow	medianpow
Bacon_Large	1	PilotStudyOld	HighED	Large	293	400	0.392438294	0.329995924	0.277565782	1	131.1069966	131.1069966	56.08704	0.195648464	0.195648464	15.58734	14.81882
Bagels_large	1	PilotStudyOld	HighED	Large	293	400	0.356680661	0.334927442	0.308391897	1	132.3627048	132.3627048	71.36108	0.109513652	0.109513652	14.81036	14.01441
Hamburgers_large	1	PilotStudyOld	HighED	Large	293	400	0.370127958	0.33965106	0.290220983	1	137.7053584	137.7053584	60.21815	0.115358362	0.115358362	15.2995	14.65715
ChickenNugget_Large	1	PilotStudyOld	HighED	Large	293	400	0.380873908	0.344189164	0.274936928	1	134.7203157	134.7203157	59.15936	0.108617747	0.108617747	15.02837	14.35236
Nachos_Large	1	PilotStudyOld	HighED	Large	293	400	0.357034218	0.339490754	0.303475028	1	148.9096843	148.9096843	60.71726	0.102133106	0.102133106	14.88415	14.27542
FishSticks_large	1	PilotStudyOld	HighED	Large	293	400	0.366790155	0.341901079	0.291308767	1	142.5936945	142.5936945	60.97322	0.085494881	0.085494881	14.81761	14.07352
FrenchFries_Large	1	PilotStudyOld	HighED	Large	293	400	0.35840942	0.339215184	0.302375396	1	145.7378242	145.7378242	64.95516	0.097013652	0.097013652	14.80325	14.03249
Grilled Cheese_large	1	PilotStudyOld	HighED	Large	293	400	0.399635408	0.335392555	0.264972037	1	174.6554949	174.6554949	48.05153	0.15	0.15	15.25445	14.54073
Sandwich_Large	1	PilotStudyOld	HighED	Large	293	400	0.379738424	0.349945427	0.27031615	1	150.9199147	150.9199147	55.21622	0.150853242	0.150853242	15.01211	14.35914
MacAndCheese_Large	1	PilotStudyOld	HighED	Large	293	400	0.378669228	0.352599565	0.268731206	1	136.1245734	136.1245734	70.17483	0.129650171	0.129650171	15.06959	14.30822
RitzCheeseCrackers_Large	1	PilotStudyOld	HighED	Large	293	400	0.363488415	0.343868899	0.292642686	1	131.5791126	131.5791126	67.77005	0.132508532	0.132508532	15.04066	14.31595
Peanuts_Large	1	PilotStudyOld	HighED	Large	293	400	0.361092241	0.339193008	0.299714752	1	153.9284215	153.9284215	60.43398	0.165998294	0.165998294	15.61125	15.16085
Pizza_Large	1	PilotStudyOld	HighED	Large	293	400	0.368893252	0.340007626	0.291099121	1	148.3477645	148.3477645	62.96642	0.113609215	0.113609215	15.28492	14.50465
PotatoChips_Large	1	PilotStudyOld	HighED	Large	293	400	0.362550227	0.339167255	0.298282517	1	149.4204608	149.4204608	62.89888	0.099701365	0.099701365	14.73712	14.10455
Pretzels_Large	1	PilotStudyOld	HighED	Large	293	400	0.376084878	0.336503487	0.287411636	1	138.1383703	138.1383703	57.70136	0.207807167	0.207807167	15.65186	15.01956
Brownie_Large	1	PilotStudyOld	HighED	Large	293	400	0.349363214	0.331835267	0.318801519	1	125.7724403	125.7724403	71.83763	0.07137372	0.07137372	15.00182	14.24677
Cake_Large	1	PilotStudyOld	HighED	Large	293	400	0.359872153	0.337343744	0.302784104	1	129.0440273	129.0440273	71.23273	0.066382253	0.066382253	14.78012	14.07441
HersheyKisses_Large	1	PilotStudyOld	HighED	Large	293	400	0.353595185	0.33256926	0.313835555	1	136.878285	136.878285	73.61429	0.077261092	0.077261092	14.97624	14.16104
Donuts_Large	1	PilotStudyOld	HighED	Large	293	400	0.356120979	0.336898817	0.306980203	1	135.79843	135.79843	65.34064	0.113011945	0.113011945	14.83494	14.08232
Starbursts_Large	1	PilotStudyOld	HighED	Large	293	400	0.357255398	0.339712968	0.303031634	1	155.0090614	155.0090614	64.57587	0.109001706	0.109001706	14.57884	13.82736
Muffins_Large	1	PilotStudyOld	HighED	Large	293	400	0.372362027	0.344767305	0.282870667	1	156.3159556	156.3159556	55.435	0.141510239	0.141510239	15.14984	14.39978
RiceKrispyTreats_Large	1	PilotStudyOld	HighED	Large	293	400	0.357978077	0.33757989	0.304442033	1	144.8306485	144.8306485	63.06501	0.092576792	0.092576792	14.91906	14.17141
Cookies_Large	1	PilotStudyOld	HighED	Large	293	400	0.354237355	0.337807821	0.307954824	1	153.7334044	153.7334044	63.42541	0.074914676	0.074914676	14.86357	14.08788
Waffels_Large	1	PilotStudyOld	HighED	Large	293	400	0.363189885	0.339513309	0.297296807	1	136.849744	136.849744	63.01099	0.102133106	0.102133106	14.94929	14.22458
IceCream_Large	1	PilotStudyOld	HighED	Large	293	400	0.365117421	0.334123263	0.300759316	1	177.1019113	177.1019113	32.26441	0.117150171	0.117150171	15.25999	14.53875
ReesesPieces_Large	1	PilotStudyOld	HighED	Large	293	400	0.386604863	0.336190151	0.277204985	1	143.6243857	143.6243857	60.69777	0.146331058	0.146331058	15.41602	14.7465
FudgePie_Large	1	PilotStudyOld	HighED	Large	293	400	0.346892756	0.334328695	0.318778549	1	150.6906485	150.6906485	64.60415	0.089889078	0.089889078	15.46541	14.68315
Oreos_Large	1	PilotStudyOld	HighED	Large	293	400	0.348252249	0.330643217	0.321104534	1	143.9969454	143.9969454	84.39185	0.068003413	0.068003413	15.4265	14.59249
CinnamonRoll_Large	1	PilotStudyOld	HighED	Large	293	400	0.369087285	0.340223932	0.290688783	1	156.3470819	156.3470819	62.69097	0.11612628	0.11612628	15.19987	14.4364
CoffeeCake(OLD)_Large	1	PilotStudyOld	HighED	Large	293	400	0.357322593	0.339592743	0.303084664	1	148.031186	148.031186	60.43289	0.065784983	0.065784983	14.7309	13.98131
IceCream_Small	1	PilotStudyOld	HighED	Small	293	400	0.35309807	0.33558248	0.31131945	1	180.1871758	180.1871758	43.2604	0.07883959	0.07883959	14.7933	13.92496
ReesesPieces_Small	1	PilotStudyOld	HighED	Small	293	400	0.375699969	0.337895533	0.286404498	1	148.4618089	148.4618089	65.81217	0.091851536	0.091851536	14.82021	14.22682
FudgePie_Small	1	PilotStudyOld	HighED	Small	293	400	0.344466738	0.334686999	0.320846262	1	149.4420478	149.4420478	65.96803	0.067150171	0.067150171	14.98438	14.31802
oreos_Small	1	PilotStudyOld	HighED	Small	293	400	0.336010397	0.327701749	0.336287855	1	148.3843345	148.3843345	69.96107	0.06190273	0.06190273	14.92026	14.13044
cinnamonRoll_Small	1	PilotStudyOld	HighED	Small	293	400	0.360102554	0.338103691	0.301793756	1	147.4801109	147.4801109	67.42349	0.082935154	0.082935154	14.86643	14.01689
CoffeeCake(OLD)_Small	1	PilotStudyOld	HighED	Small	293	400	0.353893801	0.33689945	0.309206749	1	147.5238396	147.5238396	62.04807	0.050341297	0.050341297	14.4306	13.62098
Bacon(OLD)_Small	1	PilotStudyOld	HighED	Small	293	400	0.337708068	0.323960936	0.338330996	1	162.6181911	162.6181911	62.55561	0.075255973	0.075255973	14.49388	13.78226
Bagel_Small	1	PilotStudyOld	HighED	Small	293	400	0.353875345	0.336423205	0.30970145	1	125.0588225	125.0588225	73.74937	0.080759386	0.080759386	14.68708	13.91303
Hamburger_Small	1	PilotStudyOld	HighED	Small	293	400	0.358979652	0.337743148	0.303277201	1	132.5644113	132.5644113	66.9881	0.075383959	0.075383959	14.9908	14.34177
ChickenNugget_Small	1	PilotStudyOld	HighED	Small	293	400	0.371345213	0.339320674	0.289334113	1	142.0541297	142.0541297	65.47044	0.077645051	0.077645051	14.81206	14.02538
Nachos_Small	1	PilotStudyOld	HighED	Small	293	400	0.354807954	0.337706096	0.30748595	1	152.4617747	152.4617747	64.38037	0.081825939	0.081825939	14.6879	14.00326
FishSticks_Small	1	PilotStudyOld	HighED	Small	293	400	0.362421343	0.339364885	0.298213771	1	150.0202218	150.0202218	64.09571	0.073037543	0.073037543	14.70891	13.99175
FrenchFries_Small	1	PilotStudyOld	HighED	Small	293	400	0.363115088	0.340782866	0.296102046	1	150.4766468	150.4766468	66.05541	0.076450512	0.076450512	14.63105	13.96898
GrilledCheese_Small	1	PilotStudyOld	HighED	Small	293	400	0.364623567	0.341703765	0.293672668	1	128.1472099	128.1472099	63.29063	0.0875	0.0875	15.02334	14.29102
Sandwich_Small	1	PilotStudyOld	HighED	Small	293	400	0.366941693	0.337963017	0.295095289	1	140.9757338	140.9757338	64.73227	0.101535836	0.101535836	14.72291	13.94646
MacAndCheese_Small	1	PilotStudyOld	HighED	Small	293	400	0.360113617	0.340422684	0.299463698	1	126.3378413	126.3378413	78.57725	0.062627986	0.062627986	14.71609	13.91501
RitzCheeseCrackers_Small	1	PilotStudyOld	HighED	Small	293	400	0.343445113	0.337529311	0.319025576	1	141.5961348	141.5961348	66.03445	0.075853242	0.075853242	14.64701	13.96845
Peanuts_small	1	PilotStudyOld	HighED	Small	293	400	0.359461614	0.337617584	0.302920802	1	147.3007935	147.3007935	68.32502	0.06996587	0.06996587	14.82034	14.20166
Pizza_small	1	PilotStudyOld	HighED	Small	293	400	0.362645642	0.337802028	0.29955233	1	145.6264761	145.6264761	66.35002	0.079052901	0.079052901	14.86195	14.10312
potatoChips_small	1	PilotStudyOld	HighED	Small	293	400	0.356854966	0.334894991	0.308250043	1	149.750384	149.750384	65.13364	0.056911263	0.056911263	14.37989	13.66303
Pretzels_small	1	PilotStudyOld	HighED	Small	293	400	0.342830682	0.332576011	0.324593306	1	132.6850853	132.6850853	72.17621	0.078242321	0.078242321	15.01838	14.24959
Brownie_small	1	PilotStudyOld	HighED	Small	293	400	0.347965873	0.332535034	0.319499092	1	123.3784812	123.3784812	72.55409	0.056015358	0.056015358	14.77644	13.92098
Cake_Small	1	PilotStudyOld	HighED	Small	293	400	0.354893192	0.336200892	0.308905916	1	129.6131655	129.6131655	70.48923	0.06190273	0.06190273	14.6879	14.00862
HersheyKisses_small	1	PilotStudyOld	HighED	Small	293	400	0.347602665	0.333185655	0.31921168	1	145.4228328	145.4228328	67.5881	0.06190273	0.06190273	14.55473	13.76491
Donuts_small	1	PilotStudyOld	HighED	Small	293	400	0.347955564	0.333799536	0.3182449	1	126.9247696	126.9247696	70.37828	0.072482935	0.072482935	14.63187	13.8908
Starbursts_small	1	PilotStudyOld	HighED	Small	293	400	0.355177791	0.335426945	0.309395264	1	151.6601962	151.6601962	58.37375	0.074061433	0.074061433	14.34663	13.56972
Muffins_small	1	PilotStudyOld	HighED	Small	293	400	0.365787583	0.341221706	0.292990711	1	162.2596416	162.2596416	61.21611	0.093216724	0.093216724	14.75034	13.93718
RiceKrispyTreats_Small	1	PilotStudyOld	HighED	Small	293	400	0.36398745	0.337601398	0.298411151	1	148.0518345	148.0518345	68.91998	0.052901024	0.052901024	14.58563	13.79057
Cookie_small	1	PilotStudyOld	HighED	Small	293	400	0.355918802	0.336479034	0.307602164	1	149.7759812	149.7759812	67.23522	0.060068259	0.060068259	14.61902	13.90099
Waffels_Small	1	PilotStudyOld	HighED	Small	293	400	0.362765066	0.339449507	0.297785427	1	136.1110324	136.1110324	65.5903	0.085494881	0.085494881	14.89586	14.19389
cucumber_Large	1	PilotStudyOld	LowED	Large	293	400	0.34176114	0.34755343	0.31068543	1	146.5030034	146.5030034	63.15665	0.121715017	0.121715017	15.17128	14.49662
StringBeans_large	1	PilotStudyOld	LowED	Large	293	400	0.344513369	0.359688891	0.295797739	1	129.1754778	129.1754778	66.12473	0.175469283	0.175469283	15.26957	14.35894
Lettuce_large	1	PilotStudyOld	LowED	Large	293	400	0.355006611	0.361885308	0.28310808	1	143.1793174	143.1793174	56.68131	0.158959044	0.158959044	15.5183	14.71147
MashedPotatos(OLD)_large	1	PilotStudyOld	LowED	Large	293	400	0.355535117	0.333113582	0.311351301	1	140.8434983	140.8434983	70.9717	0.039419795	0.039419795	14.44384	13.65559
Peas_Large	1	PilotStudyOld	LowED	Large	293	400	0.364741974	0.36203865	0.273219376	1	147.204727	147.204727	56.31166	0.115827645	0.115827645	15.7459	15.06898
BeansAndRice_Large	1	PilotStudyOld	LowED	Large	293	400	0.379018184	0.32328677	0.297695046	1	163.6818686	163.6818686	63.75901	0.17943686	0.17943686	15.91869	15.35367
BellPepper_Large	1	PilotStudyOld	LowED	Large	293	400	0.383522595	0.320052664	0.296424741	1	144.9576877	144.9576877	63.1456	0.139846416	0.139846416	14.99071	14.13567
TomatoSoup_Large	1	PilotStudyOld	LowED	Large	293	400	0.380189994	0.32140485	0.298405155	1	170.2582594	170.2582594	41.14069	0.079138225	0.079138225	15.06262	14.21056
Pork_Large	1	PilotStudyOld	LowED	Large	293	400	0.358372113	0.3365262	0.305101687	1	135.6126109	135.6126109	70.62708	0.075213311	0.075213311	14.89591	14.15917
Apple_large	1	PilotStudyOld	LowED	Large	293	400	0.356863333	0.333029272	0.310107396	1	155.4803669	155.4803669	55.24398	0.108447099	0.108447099	14.77975	14.03389
AppleSauce_large	1	PilotStudyOld	LowED	Large	293	400	0.362471231	0.339961959	0.29756681	1	166.6157253	166.6157253	46.62508	0.083489761	0.083489761	14.52523	13.71041
Banana_Large	1	PilotStudyOld	LowED	Large	293	400	0.345701993	0.337000979	0.317297028	1	169.0569027	169.0569027	58.33008	0.080588737	0.080588737	14.46692	13.68366
Blueberries_Large	1	PilotStudyOld	LowED	Large	293	400	0.329971152	0.329900003	0.340128845	1	155.3016809	155.3016809	70.46403	0.192192833	0.192192833	15.82668	15.05264
FruitMelody_Large	1	PilotStudyOld	LowED	Large	293	400	0.367256049	0.342993427	0.289750524	1	130.9546416	130.9546416	68.37831	0.125938567	0.125938567	14.61675	13.91131
Cantaloupe_Large	1	PilotStudyOld	LowED	Large	293	400	0.361878146	0.343361869	0.294759984	1	126.4833447	126.4833447	67.30064	0.102389078	0.102389078	14.98617	14.18739
Corn_Large	1	PilotStudyOld	LowED	Large	293	400	0.35843128	0.344370155	0.297198564	1	145.4284215	145.4284215	65.40408	0.068216724	0.068216724	14.69554	13.80253
Jello_Large	1	PilotStudyOld	LowED	Large	293	400	0.369420883	0.322079588	0.308499529	1	130.6525171	130.6525171	70.65733	0.065230375	0.065230375	14.82329	14.09546
Orange(OLD)_Large	1	PilotStudyOld	LowED	Large	293	400	0.362086351	0.34225549	0.295658159	1	150.0013396	150.0013396	60.57208	0.077090444	0.077090444	14.41237	13.54012
Carrots_Large	1	PilotStudyOld	LowED	Large	293	400	0.367191526	0.336230761	0.296577713	1	130.2244454	130.2244454	69.9698	0.08890785	0.08890785	14.75104	13.99289
Broccoli_Large	1	PilotStudyOld	LowED	Large	293	400	0.345067359	0.343989338	0.310943303	1	151.1130034	151.1130034	63.05507	0.104223549	0.104223549	15.42664	14.70503
Rice_Large	1	PilotStudyOld	LowED	Large	293	400	0.365676968	0.343185121	0.291137912	1	145.4301195	145.4301195	60.62291	0.093686007	0.093686007	15.40725	14.77729
Tomatos_Large	1	PilotStudyOld	LowED	Large	293	400	0.384633321	0.315759084	0.299607595	1	151.647756	151.647756	61.11143	0.139206485	0.139206485	15.11467	14.40789
ChickenNoodleSoup_Large	1	PilotStudyOld	LowED	Large	293	400	0.352545799	0.337683334	0.309770867	1	170.5639761	170.5639761	45.14004	0.104223549	0.104223549	14.49726	13.78399
CottageCheese(OLD)_Large	1	PilotStudyOld	LowED	Large	293	400	0.34224849	0.334544206	0.323207304	1	162.6161689	162.6161689	62.42179	0.057337884	0.057337884	14.31071	13.47624
Pineapple_Large	1	PilotStudyOld	LowED	Large	293	400	0.349470014	0.334549991	0.315979995	1	137.112756	137.112756	69.08417	0.120008532	0.120008532	14.61889	13.90885
popscile_Large	1	PilotStudyOld	LowED	Large	293	400	0.354984668	0.331846664	0.313168667	1	145.2129522	145.2129522	66.94421	0.073976109	0.073976109	14.84489	14.03135
Grapes_Large	1	PilotStudyOld	LowED	Large	293	400	0.406867477	0.307568038	0.285564484	1	155.7990358	155.7990358	66.77357	0.184812287	0.184812287	15.29764	14.48435
Strawberries_Large	1	PilotStudyOld	LowED	Large	293	400	0.424350961	0.307538145	0.268110894	1	174.3150341	174.3150341	54.98365	0.194069966	0.194069966	15.91835	15.28423
Watermelon_Large	1	PilotStudyOld	LowED	Large	293	400	0.356424239	0.349992993	0.293582769	1	145.4749317	145.4749317	64.1587	0.116382253	0.116382253	14.95417	14.14634
Yogurt_Large	1	PilotStudyOld	LowED	Large	293	400	0.349342779	0.339571936	0.311085285	1	182.1241638	182.1241638	49.33079	0.05162116	0.05162116	13.99869	13.1963
Carrots_Small	1	PilotStudyOld	LowED	Small	293	400	0.353965809	0.335629304	0.310404887	1	117.630785	117.630785	72.92492	0.063523891	0.063523891	14.58147	13.79437
Broccoli_small	1	PilotStudyOld	LowED	Small	293	400	0.34679786	0.34080242	0.312399721	1	157.4393686	157.4393686	64.03677	0.073464164	0.073464164	14.94602	14.19537
Rice_Small	1	PilotStudyOld	LowED	Small	293	400	0.356408895	0.337280885	0.306310219	1	137.2820307	137.2820307	68.57814	0.063822526	0.063822526	14.84912	14.14743
Tomatos_Large	1	PilotStudyOld	LowED	Small	293	400	0.344552649	0.328544433	0.326902918	1	154.1291126	154.1291126	66.64365	0.060025597	0.060025597	14.6006	13.88682
ChickenNoodleSoup_Small	1	PilotStudyOld	LowED	Small	293	400	0.357364062	0.338487954	0.304147984	1	175.157116	175.157116	47.92001	0.077602389	0.077602389	14.36055	13.5201
CottageCheese(OLD)_Small	1	PilotStudyOld	LowED	Small	293	400	0.343870317	0.334934612	0.321195072	1	160.0728072	160.0728072	61.56141	0.052005119	0.052005119	14.36753	13.56985
Pineapple_Small	1	PilotStudyOld	LowED	Small	293	400	0.352258748	0.332897479	0.314843772	1	128.224727	128.224727	71.58851	0.077602389	0.077602389	14.46277	13.7425
Popsicle_Small	1	PilotStudyOld	LowED	Small	293	400	0.339383209	0.329134759	0.331482032	1	142.4761775	142.4761775	70.17054	0.054308874	0.054308874	14.80534	14.02789
Grapes_Small	1	PilotStudyOld	LowED	Small	293	400	0.365480656	0.324567929	0.309951415	1	138.2470819	138.2470819	71.85228	0.082039249	0.082039249	14.94982	14.19073
Strawberries_Small	1	PilotStudyOld	LowED	Small	293	400	0.367860472	0.325142702	0.306996826	1	128.9529352	128.9529352	70.91714	0.082124573	0.082124573	15.191	14.49411
Watermelon_Small	1	PilotStudyOld	LowED	Small	293	400	0.360595833	0.346002752	0.293401415	1	130.8804778	130.8804778	69.97214	0.080460751	0.080460751	14.79506	13.99996
Yogurt_Small	1	PilotStudyOld	LowED	Small	293	400	0.3430826	0.338086245	0.318831155	1	176.3550939	176.3550939	54.01549	0.044368601	0.044368601	14.0456	13.37038
Cucumber_Small	1	PilotStudyOld	LowED	Small	293	400	0.336150692	0.337764372	0.326084936	1	150.2913908	150.2913908	63.42967	0.075085324	0.075085324	14.697	13.93255
StringBeans_Small	1	PilotStudyOld	LowED	Small	293	400	0.33730728	0.34930413	0.31338859	1	115.044599	115.044599	69.83553	0.115656997	0.115656997	14.8955	14.02725
Lettuce_Small	1	PilotStudyOld	LowED	Small	293	400	0.344870432	0.344161599	0.31096797	1	141.227099	141.227099	66.95872	0.074445392	0.074445392	14.94328	14.19177
MashedPotatos(OLD)_Small	1	PilotStudyOld	LowED	Small	293	400	0.356893151	0.334113468	0.308993381	1	135.6625	135.6625	72.15558	0.04274744	0.04274744	14.63315	13.86371
Peas_Small	1	PilotStudyOld	LowED	Small	293	400	0.350749091	0.341622409	0.3076285	1	140.8809044	140.8809044	61.60984	0.056399317	0.056399317	14.77942	13.98915
BeansAndRice_Small	1	PilotStudyOld	LowED	Small	293	400	0.33932386	0.326921547	0.333754593	1	149.3539761	149.3539761	68.03989	0.082551195	0.082551195	15.08308	14.43377
BellPepper_Small	1	PilotStudyOld	LowED	Small	293	400	0.363544946	0.330668626	0.305786429	1	142.1315102	142.1315102	65.87246	0.093686007	0.093686007	14.87587	14.08805
TomatoSoup_Small	1	PilotStudyOld	LowED	Small	293	400	0.368226102	0.32354063	0.308233268	1	166.1953584	166.1953584	45.06126	0.075042662	0.075042662	14.95273	13.88539
Pork_Small	1	PilotStudyOld	LowED	Small	293	400	0.353587523	0.335621361	0.310791115	1	132.401459	132.401459	72.62909	0.058233788	0.058233788	14.61269	13.87175
Apple_small	1	PilotStudyOld	LowED	Small	293	400	0.360851415	0.334110687	0.305037899	1	154.0583788	154.0583788	66.59831	0.068686007	0.068686007	14.7893	13.98227
Applesauce_small	1	PilotStudyOld	LowED	Small	293	400	0.356723741	0.337772236	0.305504023	1	165.6174744	165.6174744	53.14749	0.070605802	0.070605802	14.4085	13.58996
Banana_Small	1	PilotStudyOld	LowED	Small	293	400	0.337461738	0.332705289	0.329832973	1	167.0475171	167.0475171	60.3693	0.069923208	0.069923208	14.38404	13.66094
Blueberries_small	1	PilotStudyOld	LowED	Small	293	400	0.336342929	0.332929464	0.330727607	1	122.1975085	122.1975085	80.58428	0.084385666	0.084385666	15.04369	14.18421
FruitMelody_small	1	PilotStudyOld	LowED	Small	293	400	0.360614028	0.339642443	0.299743529	1	131.4894369	131.4894369	71.83807	0.080204778	0.080204778	14.6017	13.82499
Cantaloupe_Small	1	PilotStudyOld	LowED	Small	293	400	0.356654015	0.339455447	0.303890538	1	133.5958276	133.5958276	70.84212	0.07640785	0.07640785	14.74796	14.01103
Corn_Small	1	PilotStudyOld	LowED	Small	293	400	0.34585325	0.337995154	0.316151596	1	138.8310324	138.8310324	68.72847	0.055588737	0.055588737	14.53102	13.78145
Jello_Small	1	PilotStudyOld	LowED	Small	293	400	0.358943499	0.322127594	0.318928907	1	134.1189761	134.1189761	72.82954	0.053754266	0.053754266	14.63216	13.78634
Orange_Small	1	PilotStudyOld	LowED	Small	293	400	0.352340455	0.323317201	0.324342344	1	145.372628	145.372628	65.95311	0.058788396	0.058788396	14.68928	13.85744
BinderClips_Large	0	PilotStudyOld	OfficeSupplies	Large	293	400	0.342091511	0.336185557	0.321722932	1	148.7900085	148.7900085	63.55322	0.096117747	0.096117747	15.1014	14.24523
Calculator_Large	0	PilotStudyOld	OfficeSupplies	Large	293	400	0.313936832	0.373056521	0.313006648	1	147.8441724	147.8441724	65.93864	0.122269625	0.122269625	14.85947	13.93854
Chalk_Large	0	PilotStudyOld	OfficeSupplies	Large	293	400	0.34178929	0.343061958	0.315148752	1	140.841971	140.841971	70.01131	0.050682594	0.050682594	14.69974	13.8715
CoinRolls_Large	0	PilotStudyOld	OfficeSupplies	Large	293	400	0.368849257	0.332345527	0.298805216	1	147.689087	147.689087	61.40398	0.155802048	0.155802048	15.21594	14.39077
Compass_Large	0	PilotStudyOld	OfficeSupplies	Large	293	400	0.324152014	0.346552928	0.329295058	1	166.5181826	166.5181826	63.02185	0.102986348	0.102986348	14.88778	14.0465
Scissors_Large	0	PilotStudyOld	OfficeSupplies	Large	293	400	0.353711538	0.340406769	0.305881693	1	146.802099	146.802099	64.63629	0.080972696	0.080972696	14.71909	13.94518
PostItNotes(OLD)_Large	0	PilotStudyOld	OfficeSupplies	Large	293	400	0.360285478	0.340169685	0.299544837	1	140.1826365	140.1826365	68.96767	0.079522184	0.079522184	14.59699	13.83096
Erasers_Large	0	PilotStudyOld	OfficeSupplies	Large	293	400	0.346243718	0.327544989	0.326211293	1	151.0272952	151.0272952	64.32887	0.079351536	0.079351536	14.3946	13.61126
IndexCards_Large	0	PilotStudyOld	OfficeSupplies	Large	293	400	0.346873439	0.333106415	0.320020146	1	134.7326877	134.7326877	73.28809	0.039846416	0.039846416	14.39521	13.67993
Markers_Large	0	PilotStudyOld	OfficeSupplies	Large	293	400	0.349860732	0.339397268	0.310742	1	161.3174573	161.3174573	64.07148	0.09496587	0.09496587	15.07232	14.25599
Notebook_Large	0	PilotStudyOld	OfficeSupplies	Large	293	400	0.354278215	0.336393782	0.309328003	1	147.7253072	147.7253072	63.8433	0.079308874	0.079308874	14.40511	13.70068
LinedPaper_Large	0	PilotStudyOld	OfficeSupplies	Large	293	400	0.348381575	0.331159483	0.320458942	1	132.561186	132.561186	73.54956	0.089163823	0.089163823	14.49731	13.68669
Locks_Large	0	PilotStudyOld	OfficeSupplies	Large	293	400	0.337997142	0.331969896	0.330032962	1	164.4624573	164.4624573	70.6	0.096331058	0.096331058	15.15198	14.37591
PaintBrushes_Large	0	PilotStudyOld	OfficeSupplies	Large	293	400	0.307021551	0.352855654	0.340122794	1	146.1815444	146.1815444	64.27966	0.110537543	0.110537543	15.14767	14.47328
Paint_Large	0	PilotStudyOld	OfficeSupplies	Large	293	400	0.339303276	0.333254937	0.327441787	1	152.8027218	152.8027218	62.58072	0.101919795	0.101919795	14.71206	13.90132
paperclips_Large	0	PilotStudyOld	OfficeSupplies	Large	293	400	0.326906765	0.340724926	0.33236831	1	149.234198	149.234198	62.56422	0.159726962	0.159726962	15.28843	14.63615
Pens_Large	0	PilotStudyOld	OfficeSupplies	Large	293	400	0.343709836	0.331434885	0.32485528	1	149.5004608	149.5004608	64.61092	0.083191126	0.083191126	14.95415	14.19991
Pencils_Large	0	PilotStudyOld	OfficeSupplies	Large	293	400	0.354854952	0.334468831	0.310676216	1	153.3857082	153.3857082	54.68761	0.070349829	0.070349829	14.72711	14.14588
StickyNotes_Large	0	PilotStudyOld	OfficeSupplies	Large	293	400	0.357480147	0.339471049	0.303048804	1	143.5772526	143.5772526	70.92884	0.068174061	0.068174061	14.2185	13.44493
Tape_Large	0	PilotStudyOld	OfficeSupplies	Large	293	400	0.359225813	0.344424471	0.296349716	1	150.7898976	150.7898976	62.24231	0.098890785	0.098890785	14.7182	13.9754
ThumbTacks_Large	0	PilotStudyOld	OfficeSupplies	Large	293	400	0.35160497	0.343940903	0.304454128	1	152.2784727	152.2784727	66.21818	0.099744027	0.099744027	15.00082	14.26396
String_Large	0	PilotStudyOld	OfficeSupplies	Large	293	400	0.341085369	0.331349375	0.327565256	1	138.5205034	138.5205034	62.4321	0.141083618	0.141083618	15.40608	14.57371
RubberBands_Large	0	PilotStudyOld	OfficeSupplies	Large	293	400	0.372465005	0.36218514	0.265349855	1	147.4613396	147.4613396	66.3494	0.08084471	0.08084471	14.51227	13.76595
Ruler_Large	0	PilotStudyOld	OfficeSupplies	Large	293	400	0.305155511	0.39000253	0.304841959	1	162.466442	162.466442	65.76078	0.085452218	0.085452218	14.59046	13.79098
BrownMarkers_Large	0	PilotStudyOld	OfficeSupplies	Large	293	400	0.347999877	0.335689339	0.316310784	1	150.5820478	150.5820478	66.38106	0.092491468	0.092491468	15.05859	14.22365
YellowMarkers_Large	0	PilotStudyOld	OfficeSupplies	Large	293	400	0.346826394	0.344036939	0.309136668	1	140.8059812	140.8059812	66.80556	0.08225256	0.08225256	14.72475	14.00622
Stapler_Large	0	PilotStudyOld	OfficeSupplies	Large	293	400	0.371449175	0.358473899	0.270076926	1	165.2292321	165.2292321	55.29266	0.114249147	0.114249147	14.50392	13.55524
Staples_Large	0	PilotStudyOld	OfficeSupplies	Large	293	400	0.341559764	0.340055729	0.318384506	1	155.4158703	155.4158703	64.11631	0.064675768	0.064675768	14.51923	13.67535
Folders_Larger	0	PilotStudyOld	OfficeSupplies	Large	293	400	0.36608313	0.345014343	0.288902528	1	131.9119454	131.9119454	68.97036	0.073976109	0.073976109	14.14372	13.32042
PushPins_Large	0	PilotStudyOld	OfficeSupplies	Large	293	400	0.360756823	0.344660358	0.294582819	1	143.6729949	143.6729949	64.10593	0.151706485	0.151706485	15.22261	14.44001
Locks_Small	0	PilotStudyOld	OfficeSupplies	Small	293	400	0.332860401	0.332546644	0.334592956	1	147.8657509	147.8657509	78.99518	0.059726962	0.059726962	15.10174	14.25441
PaintBrushes_Small	0	PilotStudyOld	OfficeSupplies	Small	293	400	0.319785259	0.34374464	0.3364701	1	140.282884	140.282884	66.84748	0.07862628	0.07862628	14.79716	14.08331
Paint_Small	0	PilotStudyOld	OfficeSupplies	Small	293	400	0.335638225	0.332288384	0.332073391	1	150.2109727	150.2109727	66.19641	0.075511945	0.075511945	14.70393	13.89826
Paperclips_Small	0	PilotStudyOld	OfficeSupplies	Small	293	400	0.33106735	0.331954476	0.336978175	1	150.8657423	150.8657423	64.76083	0.069283276	0.069283276	14.77208	14.05758
Pens_small	0	PilotStudyOld	OfficeSupplies	Small	293	400	0.337962975	0.331342762	0.330694263	1	149.3964249	149.3964249	64.79947	0.059044369	0.059044369	14.63533	13.89682
Pencils_Large	0	PilotStudyOld	OfficeSupplies	Small	293	400	0.357050249	0.337799366	0.305150385	1	151.2018515	151.2018515	57.50056	0.063865188	0.063865188	14.52486	13.86324
StickyNotes_Small	0	PilotStudyOld	OfficeSupplies	Small	293	400	0.35286081	0.337332674	0.309806517	1	140.0632594	140.0632594	73.14701	0.052773038	0.052773038	14.18589	13.46305
Tape_Small	0	PilotStudyOld	OfficeSupplies	Small	293	400	0.354891162	0.334635027	0.310473811	1	145.6376792	145.6376792	69.66858	0.06331058	0.06331058	14.21503	13.42979
ThumbTacks_Small	0	PilotStudyOld	OfficeSupplies	Small	293	400	0.339970876	0.336966574	0.323062551	1	142.9420222	142.9420222	69.34327	0.063182594	0.063182594	14.87445	14.15915
String_Small	0	PilotStudyOld	OfficeSupplies	Small	293	400	0.349844815	0.333265786	0.316889399	1	129.1067833	129.1067833	75.76042	0.059087031	0.059087031	14.35322	13.58007
RubberBands_Small	0	PilotStudyOld	OfficeSupplies	Small	293	400	0.339445909	0.339991442	0.32056265	1	145.4332509	145.4332509	66.95356	0.054095563	0.054095563	14.1759	13.41903
Ruler_Small	0	PilotStudyOld	OfficeSupplies	Small	293	400	0.318768644	0.362803366	0.31842799	1	149.6000256	149.6000256	64.25816	0.075682594	0.075682594	14.74264	14.03026
BrownMarkers_Small	0	PilotStudyOld	OfficeSupplies	Small	293	400	0.340606522	0.336522406	0.322871072	1	143.0220392	143.0220392	70.15632	0.070648464	0.070648464	14.93682	14.16139
YellowMarkers_Small	0	PilotStudyOld	OfficeSupplies	Small	293	400	0.33939646	0.339112349	0.321491192	1	136.4661519	136.4661519	68.62897	0.065230375	0.065230375	14.6346	13.92297
Stapler_Large	0	PilotStudyOld	OfficeSupplies	Small	293	400	0.356069555	0.350409392	0.293521053	1	153.0932509	153.0932509	62.03556	0.0875	0.0875	14.56932	13.73545
Staples_Small	0	PilotStudyOld	OfficeSupplies	Small	293	400	0.335840639	0.336614598	0.327544763	1	143.3484471	143.3484471	67.2321	0.05524744	0.05524744	14.37805	13.56673
Folders_Small	0	PilotStudyOld	OfficeSupplies	Small	293	400	0.360018078	0.340016372	0.29996555	1	130.2941297	130.2941297	74.66498	0.05746587	0.05746587	14.23415	13.39627
PushPins_Small	0	PilotStudyOld	OfficeSupplies	Small	293	400	0.343735202	0.338699172	0.317565626	1	136.4630375	136.4630375	69.65539	0.071288396	0.071288396	14.87369	14.15839
BinderClips_Small	0	PilotStudyOld	OfficeSupplies	Small	293	400	0.334055095	0.33035677	0.335588135	1	150.9843003	150.9843003	63.23965	0.052474403	0.052474403	14.45613	13.67098
Calculator_Small	0	PilotStudyOld	OfficeSupplies	Small	293	400	0.324283949	0.347816015	0.327900036	1	142.9631058	142.9631058	65.42403	0.082423208	0.082423208	14.91517	14.12623
Chalk_Small	0	PilotStudyOld	OfficeSupplies	Small	293	400	0.33474696	0.337306391	0.327946649	1	142.3800512	142.3800512	65.67572	0.044880546	0.044880546	14.46127	13.66605
CoinRolls_Small	0	PilotStudyOld	OfficeSupplies	Small	293	400	0.361540605	0.336837954	0.301621441	1	125.2228498	125.2228498	72.87563	0.093131399	0.093131399	14.94868	14.07337
Compass_Small	0	PilotStudyOld	OfficeSupplies	Small	293	400	0.329847934	0.33733138	0.332820686	1	152.8061263	152.8061263	64.23989	0.069923208	0.069923208	14.91873	14.15596
Scissors_Small	0	PilotStudyOld	OfficeSupplies	Small	293	400	0.345872564	0.335773832	0.318353604	1	152.7480461	152.7480461	63.24713	0.059598976	0.059598976	14.63652	13.91181
PostItNotes(OLD)_Small	0	PilotStudyOld	OfficeSupplies	Small	293	400	0.352327619	0.337874357	0.309798024	1	140.407628	140.407628	70.78314	0.062798635	0.062798635	14.47404	13.74469
Erasers_Small	0	PilotStudyOld	OfficeSupplies	Small	293	400	0.337591435	0.33188689	0.330521675	1	137.5999403	137.5999403	69.86378	0.056697952	0.056697952	14.31979	13.54028
IndexCards_Small	0	PilotStudyOld	OfficeSupplies	Small	293	400	0.353460377	0.332972441	0.313567182	1	131.2873464	131.2873464	74.72789	0.040187713	0.040187713	14.34481	13.59236
Markers_Small	0	PilotStudyOld	OfficeSupplies	Small	293	400	0.352373806	0.336724017	0.310902177	1	155.7203754	155.7203754	65.82143	0.073037543	0.073037543	14.80448	13.99764
Notebook_Small	0	PilotStudyOld	OfficeSupplies	Small	293	400	0.357412105	0.336266887	0.306321008	1	140.2528584	140.2528584	69.56136	0.064633106	0.064633106	14.52731	13.84835
LinedPaper_Small	0	PilotStudyOld	OfficeSupplies	Small	293	400	0.354623621	0.33234416	0.313032219	1	129.7605375	129.7605375	74.73159	0.066254266	0.066254266	14.28448	13.57783
Bacon_Large	1	PilotStudyUpdate	HighED	Large	293	400	0.392438294	0.329995924	0.277565782	1	131.1069966	131.1069966	56.08704	0.195648464	0.195648464	15.58734	14.81882
Bagels_large	1	PilotStudyUpdate	HighED	Large	293	400	0.356680661	0.334927442	0.308391897	1	132.3627048	132.3627048	71.36108	0.109513652	0.109513652	14.81036	14.01441
Hamburgers_large	1	PilotStudyUpdate	HighED	Large	293	400	0.370127958	0.33965106	0.290220983	1	137.7053584	137.7053584	60.21815	0.115358362	0.115358362	15.2995	14.65715
ChickenNugget_Large	1	PilotStudyUpdate	HighED	Large	293	400	0.380873908	0.344189164	0.274936928	1	134.7203157	134.7203157	59.15936	0.108617747	0.108617747	15.02837	14.35236
Nachos_Large	1	PilotStudyUpdate	HighED	Large	293	400	0.357034218	0.339490754	0.303475028	1	148.9096843	148.9096843	60.71726	0.102133106	0.102133106	14.88415	14.27542
FishSticks_large	1	PilotStudyUpdate	HighED	Large	293	400	0.366790155	0.341901079	0.291308767	1	142.5936945	142.5936945	60.97322	0.085494881	0.085494881	14.81761	14.07352
FrenchFries_Large	1	PilotStudyUpdate	HighED	Large	293	400	0.35840942	0.339215184	0.302375396	1	145.7378242	145.7378242	64.95516	0.097013652	0.097013652	14.80325	14.03249
Grilled Cheese_large	1	PilotStudyUpdate	HighED	Large	293	400	0.399635408	0.335392555	0.264972037	1	174.6554949	174.6554949	48.05153	0.15	0.15	15.25445	14.54073
Sandwich_Large	1	PilotStudyUpdate	HighED	Large	293	400	0.379738424	0.349945427	0.27031615	1	150.9199147	150.9199147	55.21622	0.150853242	0.150853242	15.01211	14.35914
MacAndCheese_Large	1	PilotStudyUpdate	HighED	Large	293	400	0.378669228	0.352599565	0.268731206	1	136.1245734	136.1245734	70.17483	0.129650171	0.129650171	15.06959	14.30822
RitzCheeseCrackers_Large	1	PilotStudyUpdate	HighED	Large	293	400	0.363488415	0.343868899	0.292642686	1	131.5791126	131.5791126	67.77005	0.132508532	0.132508532	15.04066	14.31595
Peanuts_Large	1	PilotStudyUpdate	HighED	Large	293	400	0.361092241	0.339193008	0.299714752	1	153.9284215	153.9284215	60.43398	0.165998294	0.165998294	15.61125	15.16085
Pizza_Large	1	PilotStudyUpdate	HighED	Large	293	400	0.368893252	0.340007626	0.291099121	1	148.3477645	148.3477645	62.96642	0.113609215	0.113609215	15.28492	14.50465
PotatoChips_Large	1	PilotStudyUpdate	HighED	Large	293	400	0.362550227	0.339167255	0.298282517	1	149.4204608	149.4204608	62.89888	0.099701365	0.099701365	14.73712	14.10455
Pretzels_Large	1	PilotStudyUpdate	HighED	Large	293	400	0.376084878	0.336503487	0.287411636	1	138.1383703	138.1383703	57.70136	0.207807167	0.207807167	15.65186	15.01956
Brownie_Large	1	PilotStudyUpdate	HighED	Large	293	400	0.349363214	0.331835267	0.318801519	1	125.7724403	125.7724403	71.83763	0.07137372	0.07137372	15.00182	14.24677
Cake_Large	1	PilotStudyUpdate	HighED	Large	293	400	0.359872153	0.337343744	0.302784104	1	129.0440273	129.0440273	71.23273	0.066382253	0.066382253	14.78012	14.07441
HersheyKisses_Large	1	PilotStudyUpdate	HighED	Large	293	400	0.353595185	0.33256926	0.313835555	1	136.878285	136.878285	73.61429	0.077261092	0.077261092	14.97624	14.16104
Donuts_Large	1	PilotStudyUpdate	HighED	Large	293	400	0.356120979	0.336898817	0.306980203	1	135.79843	135.79843	65.34064	0.113011945	0.113011945	14.83494	14.08232
Starbursts_Large	1	PilotStudyUpdate	HighED	Large	293	400	0.357255398	0.339712968	0.303031634	1	155.0090614	155.0090614	64.57587	0.109001706	0.109001706	14.57884	13.82736
Muffins_Large	1	PilotStudyUpdate	HighED	Large	293	400	0.372362027	0.344767305	0.282870667	1	156.3159556	156.3159556	55.435	0.141510239	0.141510239	15.14984	14.39978
RiceKrispyTreats_Large	1	PilotStudyUpdate	HighED	Large	293	400	0.357978077	0.33757989	0.304442033	1	144.8306485	144.8306485	63.06501	0.092576792	0.092576792	14.91906	14.17141
Cookies_Large	1	PilotStudyUpdate	HighED	Large	293	400	0.354237355	0.337807821	0.307954824	1	153.7334044	153.7334044	63.42541	0.074914676	0.074914676	14.86357	14.08788
Waffels_Large	1	PilotStudyUpdate	HighED	Large	293	400	0.363189885	0.339513309	0.297296807	1	136.849744	136.849744	63.01099	0.102133106	0.102133106	14.94929	14.22458
IceCream_Large	1	PilotStudyUpdate	HighED	Large	293	400	0.365117421	0.334123263	0.300759316	1	177.1019113	177.1019113	32.26441	0.117150171	0.117150171	15.25999	14.53875
ReesesPieces_Large	1	PilotStudyUpdate	HighED	Large	293	400	0.386604863	0.336190151	0.277204985	1	143.6243857	143.6243857	60.69777	0.146331058	0.146331058	15.41602	14.7465
FudgePie_Large	1	PilotStudyUpdate	HighED	Large	293	400	0.346892756	0.334328695	0.318778549	1	150.6906485	150.6906485	64.60415	0.089889078	0.089889078	15.46541	14.68315
Oreos_Large	1	PilotStudyUpdate	HighED	Large	293	400	0.348252249	0.330643217	0.321104534	1	143.9969454	143.9969454	84.39185	0.068003413	0.068003413	15.4265	14.59249
CinnamonRoll_Large	1	PilotStudyUpdate	HighED	Large	293	400	0.369087285	0.340223932	0.290688783	1	156.3470819	156.3470819	62.69097	0.11612628	0.11612628	15.19987	14.4364
CoffeeCake_Large	1	PilotStudyUpdate	HighED	Large	293	400	0.355764797	0.339425179	0.304810024	1	146.389215	146.389215	62.36396	0.070051195	0.070051195	15.09041	14.21388
IceCream_Small	1	PilotStudyUpdate	HighED	Small	293	400	0.35309807	0.33558248	0.31131945	1	180.1871758	180.1871758	43.2604	0.07883959	0.07883959	14.7933	13.92496
ReesesPieces_Small	1	PilotStudyUpdate	HighED	Small	293	400	0.375699969	0.337895533	0.286404498	1	148.4618089	148.4618089	65.81217	0.091851536	0.091851536	14.82021	14.22682
FudgePie_Small	1	PilotStudyUpdate	HighED	Small	293	400	0.344466738	0.334686999	0.320846262	1	149.4420478	149.4420478	65.96803	0.067150171	0.067150171	14.98438	14.31802
oreos_Small	1	PilotStudyUpdate	HighED	Small	293	400	0.336010397	0.327701749	0.336287855	1	148.3843345	148.3843345	69.96107	0.06190273	0.06190273	14.92026	14.13044
cinnamonRoll_Small	1	PilotStudyUpdate	HighED	Small	293	400	0.360102554	0.338103691	0.301793756	1	147.4801109	147.4801109	67.42349	0.082935154	0.082935154	14.86643	14.01689
CoffeeCake_Small	1	PilotStudyUpdate	HighED	Small	293	400	0.354446013	0.337095934	0.308458053	1	154.5857765	154.5857765	60.81684	0.057849829	0.057849829	15.33975	14.66782
Bacon_Small	1	PilotStudyUpdate	HighED	Small	293	400	0.330798667	0.325015647	0.344185686	1	159.4919539	159.4919539	63.26739	0.062585324	0.062585324	15.15444	14.26663
Bagel_Small	1	PilotStudyUpdate	HighED	Small	293	400	0.353875345	0.336423205	0.30970145	1	125.0588225	125.0588225	73.74937	0.080759386	0.080759386	14.68708	13.91303
Hamburger_Small	1	PilotStudyUpdate	HighED	Small	293	400	0.358979652	0.337743148	0.303277201	1	132.5644113	132.5644113	66.9881	0.075383959	0.075383959	14.9908	14.34177
ChickenNugget_Small	1	PilotStudyUpdate	HighED	Small	293	400	0.371345213	0.339320674	0.289334113	1	142.0541297	142.0541297	65.47044	0.077645051	0.077645051	14.81206	14.02538
Nachos_Small	1	PilotStudyUpdate	HighED	Small	293	400	0.354807954	0.337706096	0.30748595	1	152.4617747	152.4617747	64.38037	0.081825939	0.081825939	14.6879	14.00326
FishSticks_Small	1	PilotStudyUpdate	HighED	Small	293	400	0.362421343	0.339364885	0.298213771	1	150.0202218	150.0202218	64.09571	0.073037543	0.073037543	14.70891	13.99175
FrenchFries_Small	1	PilotStudyUpdate	HighED	Small	293	400	0.363115088	0.340782866	0.296102046	1	150.4766468	150.4766468	66.05541	0.076450512	0.076450512	14.63105	13.96898
GrilledCheese_Small	1	PilotStudyUpdate	HighED	Small	293	400	0.364623567	0.341703765	0.293672668	1	128.1472099	128.1472099	63.29063	0.0875	0.0875	15.02334	14.29102
Sandwich_Small	1	PilotStudyUpdate	HighED	Small	293	400	0.366941693	0.337963017	0.295095289	1	140.9757338	140.9757338	64.73227	0.101535836	0.101535836	14.72291	13.94646
MacAndCheese_Small	1	PilotStudyUpdate	HighED	Small	293	400	0.360113617	0.340422684	0.299463698	1	126.3378413	126.3378413	78.57725	0.062627986	0.062627986	14.71609	13.91501
RitzCheeseCrackers_Small	1	PilotStudyUpdate	HighED	Small	293	400	0.343445113	0.337529311	0.319025576	1	141.5961348	141.5961348	66.03445	0.075853242	0.075853242	14.64701	13.96845
Peanuts_small	1	PilotStudyUpdate	HighED	Small	293	400	0.359461614	0.337617584	0.302920802	1	147.3007935	147.3007935	68.32502	0.06996587	0.06996587	14.82034	14.20166
Pizza_small	1	PilotStudyUpdate	HighED	Small	293	400	0.362645642	0.337802028	0.29955233	1	145.6264761	145.6264761	66.35002	0.079052901	0.079052901	14.86195	14.10312
potatoChips_small	1	PilotStudyUpdate	HighED	Small	293	400	0.356854966	0.334894991	0.308250043	1	149.750384	149.750384	65.13364	0.056911263	0.056911263	14.37989	13.66303
Pretzels_small	1	PilotStudyUpdate	HighED	Small	293	400	0.342830682	0.332576011	0.324593306	1	132.6850853	132.6850853	72.17621	0.078242321	0.078242321	15.01838	14.24959
Brownie_small	1	PilotStudyUpdate	HighED	Small	293	400	0.347965873	0.332535034	0.319499092	1	123.3784812	123.3784812	72.55409	0.056015358	0.056015358	14.77644	13.92098
Cake_Small	1	PilotStudyUpdate	HighED	Small	293	400	0.354893192	0.336200892	0.308905916	1	129.6131655	129.6131655	70.48923	0.06190273	0.06190273	14.6879	14.00862
HersheyKisses_small	1	PilotStudyUpdate	HighED	Small	293	400	0.347602665	0.333185655	0.31921168	1	145.4228328	145.4228328	67.5881	0.06190273	0.06190273	14.55473	13.76491
Donuts_small	1	PilotStudyUpdate	HighED	Small	293	400	0.347955564	0.333799536	0.3182449	1	126.9247696	126.9247696	70.37828	0.072482935	0.072482935	14.63187	13.8908
Starbursts_small	1	PilotStudyUpdate	HighED	Small	293	400	0.355177791	0.335426945	0.309395264	1	151.6601962	151.6601962	58.37375	0.074061433	0.074061433	14.34663	13.56972
Muffins_small	1	PilotStudyUpdate	HighED	Small	293	400	0.365787583	0.341221706	0.292990711	1	162.2596416	162.2596416	61.21611	0.093216724	0.093216724	14.75034	13.93718
RiceKrispyTreats_Small	1	PilotStudyUpdate	HighED	Small	293	400	0.36398745	0.337601398	0.298411151	1	148.0518345	148.0518345	68.91998	0.052901024	0.052901024	14.58563	13.79057
Cookie_small	1	PilotStudyUpdate	HighED	Small	293	400	0.355918802	0.336479034	0.307602164	1	149.7759812	149.7759812	67.23522	0.060068259	0.060068259	14.61902	13.90099
Waffels_Small	1	PilotStudyUpdate	HighED	Small	293	400	0.362765066	0.339449507	0.297785427	1	136.1110324	136.1110324	65.5903	0.085494881	0.085494881	14.89586	14.19389
cucumber_Large	1	PilotStudyUpdate	LowED	Large	293	400	0.34176114	0.34755343	0.31068543	1	146.5030034	146.5030034	63.15665	0.121715017	0.121715017	15.17128	14.49662
StringBeans_large	1	PilotStudyUpdate	LowED	Large	293	400	0.344513369	0.359688891	0.295797739	1	129.1754778	129.1754778	66.12473	0.175469283	0.175469283	15.26957	14.35894
Lettuce_large	1	PilotStudyUpdate	LowED	Large	293	400	0.355006611	0.361885308	0.28310808	1	143.1793174	143.1793174	56.68131	0.158959044	0.158959044	15.5183	14.71147
Potatos_Large	1	PilotStudyUpdate	LowED	Large	293	400	0.362232425	0.340556795	0.29721078	1	140.2074829	140.2074829	68.83617	0.113651877	0.113651877	15.45467	14.68982
Peas_Large	1	PilotStudyUpdate	LowED	Large	293	400	0.364741974	0.36203865	0.273219376	1	147.204727	147.204727	56.31166	0.115827645	0.115827645	15.7459	15.06898
BeansAndRice_Large	1	PilotStudyUpdate	LowED	Large	293	400	0.379018184	0.32328677	0.297695046	1	163.6818686	163.6818686	63.75901	0.17943686	0.17943686	15.91869	15.35367
BellPepper_Large	1	PilotStudyUpdate	LowED	Large	293	400	0.383522595	0.320052664	0.296424741	1	144.9576877	144.9576877	63.1456	0.139846416	0.139846416	14.99071	14.13567
TomatoSoup_Large	1	PilotStudyUpdate	LowED	Large	293	400	0.380189994	0.32140485	0.298405155	1	170.2582594	170.2582594	41.14069	0.079138225	0.079138225	15.06262	14.21056
Pork_Large	1	PilotStudyUpdate	LowED	Large	293	400	0.358372113	0.3365262	0.305101687	1	135.6126109	135.6126109	70.62708	0.075213311	0.075213311	14.89591	14.15917
Apple_large	1	PilotStudyUpdate	LowED	Large	293	400	0.356863333	0.333029272	0.310107396	1	155.4803669	155.4803669	55.24398	0.108447099	0.108447099	14.77975	14.03389
AppleSauce_large	1	PilotStudyUpdate	LowED	Large	293	400	0.362471231	0.339961959	0.29756681	1	166.6157253	166.6157253	46.62508	0.083489761	0.083489761	14.52523	13.71041
Banana_Large	1	PilotStudyUpdate	LowED	Large	293	400	0.345701993	0.337000979	0.317297028	1	169.0569027	169.0569027	58.33008	0.080588737	0.080588737	14.46692	13.68366
Blueberries_Large	1	PilotStudyUpdate	LowED	Large	293	400	0.329971152	0.329900003	0.340128845	1	155.3016809	155.3016809	70.46403	0.192192833	0.192192833	15.82668	15.05264
FruitMelody_Large	1	PilotStudyUpdate	LowED	Large	293	400	0.367256049	0.342993427	0.289750524	1	130.9546416	130.9546416	68.37831	0.125938567	0.125938567	14.61675	13.91131
Cantaloupe_Large	1	PilotStudyUpdate	LowED	Large	293	400	0.361878146	0.343361869	0.294759984	1	126.4833447	126.4833447	67.30064	0.102389078	0.102389078	14.98617	14.18739
Corn_Large	1	PilotStudyUpdate	LowED	Large	293	400	0.35843128	0.344370155	0.297198564	1	145.4284215	145.4284215	65.40408	0.068216724	0.068216724	14.69554	13.80253
Jello_Large	1	PilotStudyUpdate	LowED	Large	293	400	0.369420883	0.322079588	0.308499529	1	130.6525171	130.6525171	70.65733	0.065230375	0.065230375	14.82329	14.09546
Orange_Large	1	PilotStudyUpdate	LowED	Large	293	400	0.369031538	0.335445289	0.295523174	1	152.1022782	152.1022782	59.47288	0.07418942	0.07418942	15.16338	14.35713
Carrots_Large	1	PilotStudyUpdate	LowED	Large	293	400	0.367191526	0.336230761	0.296577713	1	130.2244454	130.2244454	69.9698	0.08890785	0.08890785	14.75104	13.99289
Broccoli_Large	1	PilotStudyUpdate	LowED	Large	293	400	0.345067359	0.343989338	0.310943303	1	151.1130034	151.1130034	63.05507	0.104223549	0.104223549	15.42664	14.70503
Rice_Large	1	PilotStudyUpdate	LowED	Large	293	400	0.365676968	0.343185121	0.291137912	1	145.4301195	145.4301195	60.62291	0.093686007	0.093686007	15.40725	14.77729
Tomatos_Large	1	PilotStudyUpdate	LowED	Large	293	400	0.384633321	0.315759084	0.299607595	1	151.647756	151.647756	61.11143	0.139206485	0.139206485	15.11467	14.40789
ChickenNoodleSoup_Large	1	PilotStudyUpdate	LowED	Large	293	400	0.352545799	0.337683334	0.309770867	1	170.5639761	170.5639761	45.14004	0.104223549	0.104223549	14.49726	13.78399
Turkey_Large	1	PilotStudyUpdate	LowED	Large	293	400	0.358147563	0.337760675	0.304091762	1	148.7080034	148.7080034	67.61671	0.109940273	0.109940273	15.63007	14.908
Pineapple_Large	1	PilotStudyUpdate	LowED	Large	293	400	0.349470014	0.334549991	0.315979995	1	137.112756	137.112756	69.08417	0.120008532	0.120008532	14.61889	13.90885
popscile_Large	1	PilotStudyUpdate	LowED	Large	293	400	0.354984668	0.331846664	0.313168667	1	145.2129522	145.2129522	66.94421	0.073976109	0.073976109	14.84489	14.03135
Grapes_Large	1	PilotStudyUpdate	LowED	Large	293	400	0.406867477	0.307568038	0.285564484	1	155.7990358	155.7990358	66.77357	0.184812287	0.184812287	15.29764	14.48435
Strawberries_Large	1	PilotStudyUpdate	LowED	Large	293	400	0.424350961	0.307538145	0.268110894	1	174.3150341	174.3150341	54.98365	0.194069966	0.194069966	15.91835	15.28423
Watermelon_Large	1	PilotStudyUpdate	LowED	Large	293	400	0.356424239	0.349992993	0.293582769	1	145.4749317	145.4749317	64.1587	0.116382253	0.116382253	14.95417	14.14634
Yogurt_Large	1	PilotStudyUpdate	LowED	Large	293	400	0.349342779	0.339571936	0.311085285	1	182.1241638	182.1241638	49.33079	0.05162116	0.05162116	13.99869	13.1963
Carrots_Small	1	PilotStudyUpdate	LowED	Small	293	400	0.353965809	0.335629304	0.310404887	1	117.630785	117.630785	72.92492	0.063523891	0.063523891	14.58147	13.79437
Broccoli_small	1	PilotStudyUpdate	LowED	Small	293	400	0.34679786	0.34080242	0.312399721	1	157.4393686	157.4393686	64.03677	0.073464164	0.073464164	14.94602	14.19537
Rice_Small	1	PilotStudyUpdate	LowED	Small	293	400	0.356408895	0.337280885	0.306310219	1	137.2820307	137.2820307	68.57814	0.063822526	0.063822526	14.84912	14.14743
Tomatos_Large	1	PilotStudyUpdate	LowED	Small	293	400	0.344552649	0.328544433	0.326902918	1	154.1291126	154.1291126	66.64365	0.060025597	0.060025597	14.6006	13.88682
ChickenNoodleSoup_Small	1	PilotStudyUpdate	LowED	Small	293	400	0.357364062	0.338487954	0.304147984	1	175.157116	175.157116	47.92001	0.077602389	0.077602389	14.36055	13.5201
Turkey_Small	1	PilotStudyUpdate	LowED	Small	293	400	0.356989311	0.336947882	0.306062807	1	137.9744369	137.9744369	71.49213	0.078583618	0.078583618	15.40276	14.68792
Pineapple_Small	1	PilotStudyUpdate	LowED	Small	293	400	0.352258748	0.332897479	0.314843772	1	128.224727	128.224727	71.58851	0.077602389	0.077602389	14.46277	13.7425
Popsicle_Small	1	PilotStudyUpdate	LowED	Small	293	400	0.339383209	0.329134759	0.331482032	1	142.4761775	142.4761775	70.17054	0.054308874	0.054308874	14.80534	14.02789
Grapes_Small	1	PilotStudyUpdate	LowED	Small	293	400	0.365480656	0.324567929	0.309951415	1	138.2470819	138.2470819	71.85228	0.082039249	0.082039249	14.94982	14.19073
Strawberries_Small	1	PilotStudyUpdate	LowED	Small	293	400	0.367860472	0.325142702	0.306996826	1	128.9529352	128.9529352	70.91714	0.082124573	0.082124573	15.191	14.49411
Watermelon_Small	1	PilotStudyUpdate	LowED	Small	293	400	0.360595833	0.346002752	0.293401415	1	130.8804778	130.8804778	69.97214	0.080460751	0.080460751	14.79506	13.99996
Yogurt_Small	1	PilotStudyUpdate	LowED	Small	293	400	0.3430826	0.338086245	0.318831155	1	176.3550939	176.3550939	54.01549	0.044368601	0.044368601	14.0456	13.37038
Cucumber_Small	1	PilotStudyUpdate	LowED	Small	293	400	0.336150692	0.337764372	0.326084936	1	150.2913908	150.2913908	63.42967	0.075085324	0.075085324	14.697	13.93255
StringBeans_Small	1	PilotStudyUpdate	LowED	Small	293	400	0.33730728	0.34930413	0.31338859	1	115.044599	115.044599	69.83553	0.115656997	0.115656997	14.8955	14.02725
Lettuce_Small	1	PilotStudyUpdate	LowED	Small	293	400	0.344870432	0.344161599	0.31096797	1	141.227099	141.227099	66.95872	0.074445392	0.074445392	14.94328	14.19177
Potatos_Small	1	PilotStudyUpdate	LowED	Small	293	400	0.358358415	0.338643678	0.302997907	1	139.5382338	139.5382338	71.05128	0.073634812	0.073634812	15.29561	14.49273
Peas_Small	1	PilotStudyUpdate	LowED	Small	293	400	0.350749091	0.341622409	0.3076285	1	140.8809044	140.8809044	61.60984	0.056399317	0.056399317	14.77942	13.98915
BeansAndRice_Small	1	PilotStudyUpdate	LowED	Small	293	400	0.33932386	0.326921547	0.333754593	1	149.3539761	149.3539761	68.03989	0.082551195	0.082551195	15.08308	14.43377
BellPepper_Small	1	PilotStudyUpdate	LowED	Small	293	400	0.363544946	0.330668626	0.305786429	1	142.1315102	142.1315102	65.87246	0.093686007	0.093686007	14.87587	14.08805
TomatoSoup_Small	1	PilotStudyUpdate	LowED	Small	293	400	0.368226102	0.32354063	0.308233268	1	166.1953584	166.1953584	45.06126	0.075042662	0.075042662	14.95273	13.88539
Pork_Small	1	PilotStudyUpdate	LowED	Small	293	400	0.353587523	0.335621361	0.310791115	1	132.401459	132.401459	72.62909	0.058233788	0.058233788	14.61269	13.87175
Apple_small	1	PilotStudyUpdate	LowED	Small	293	400	0.360851415	0.334110687	0.305037899	1	154.0583788	154.0583788	66.59831	0.068686007	0.068686007	14.7893	13.98227
Applesauce_small	1	PilotStudyUpdate	LowED	Small	293	400	0.356723741	0.337772236	0.305504023	1	165.6174744	165.6174744	53.14749	0.070605802	0.070605802	14.4085	13.58996
Banana_Small	1	PilotStudyUpdate	LowED	Small	293	400	0.337461738	0.332705289	0.329832973	1	167.0475171	167.0475171	60.3693	0.069923208	0.069923208	14.38404	13.66094
Blueberries_small	1	PilotStudyUpdate	LowED	Small	293	400	0.336342929	0.332929464	0.330727607	1	122.1975085	122.1975085	80.58428	0.084385666	0.084385666	15.04369	14.18421
FruitMelody_small	1	PilotStudyUpdate	LowED	Small	293	400	0.360614028	0.339642443	0.299743529	1	131.4894369	131.4894369	71.83807	0.080204778	0.080204778	14.6017	13.82499
Cantaloupe_Small	1	PilotStudyUpdate	LowED	Small	293	400	0.356654015	0.339455447	0.303890538	1	133.5958276	133.5958276	70.84212	0.07640785	0.07640785	14.74796	14.01103
Corn_Small	1	PilotStudyUpdate	LowED	Small	293	400	0.34585325	0.337995154	0.316151596	1	138.8310324	138.8310324	68.72847	0.055588737	0.055588737	14.53102	13.78145
Jello_Small	1	PilotStudyUpdate	LowED	Small	293	400	0.358943499	0.322127594	0.318928907	1	134.1189761	134.1189761	72.82954	0.053754266	0.053754266	14.63216	13.78634
Orange_Small	1	PilotStudyUpdate	LowED	Small	293	400	0.352340455	0.323317201	0.324342344	1	145.372628	145.372628	65.95311	0.058788396	0.058788396	14.68928	13.85744
BinderClips_Large	0	PilotStudyUpdate	OfficeSupplies	Large	293	400	0.342091511	0.336185557	0.321722932	1	148.7900085	148.7900085	63.55322	0.096117747	0.096117747	15.1014	14.24523
Calculator_Large	0	PilotStudyUpdate	OfficeSupplies	Large	293	400	0.313936832	0.373056521	0.313006648	1	147.8441724	147.8441724	65.93864	0.122269625	0.122269625	14.85947	13.93854
Chalk_Large	0	PilotStudyUpdate	OfficeSupplies	Large	293	400	0.34178929	0.343061958	0.315148752	1	140.841971	140.841971	70.01131	0.050682594	0.050682594	14.69974	13.8715
CoinRolls_Large	0	PilotStudyUpdate	OfficeSupplies	Large	293	400	0.368849257	0.332345527	0.298805216	1	147.689087	147.689087	61.40398	0.155802048	0.155802048	15.21594	14.39077
Compass_Large	0	PilotStudyUpdate	OfficeSupplies	Large	293	400	0.324152014	0.346552928	0.329295058	1	166.5181826	166.5181826	63.02185	0.102986348	0.102986348	14.88778	14.0465
Scissors_Large	0	PilotStudyUpdate	OfficeSupplies	Large	293	400	0.353711538	0.340406769	0.305881693	1	146.802099	146.802099	64.63629	0.080972696	0.080972696	14.71909	13.94518
YellowPaperclips_Large	0	PilotStudyUpdate	OfficeSupplies	Large	293	400	0.360737733	0.338607169	0.300655098	1	146.0477986	146.0477986	68.92111	0.134641638	0.134641638	15.57505	14.84825
Erasers_Large	0	PilotStudyUpdate	OfficeSupplies	Large	293	400	0.346243718	0.327544989	0.326211293	1	151.0272952	151.0272952	64.32887	0.079351536	0.079351536	14.3946	13.61126
IndexCards_Large	0	PilotStudyUpdate	OfficeSupplies	Large	293	400	0.346873439	0.333106415	0.320020146	1	134.7326877	134.7326877	73.28809	0.039846416	0.039846416	14.39521	13.67993
Markers_Large	0	PilotStudyUpdate	OfficeSupplies	Large	293	400	0.349860732	0.339397268	0.310742	1	161.3174573	161.3174573	64.07148	0.09496587	0.09496587	15.07232	14.25599
Notebook_Large	0	PilotStudyUpdate	OfficeSupplies	Large	293	400	0.354278215	0.336393782	0.309328003	1	147.7253072	147.7253072	63.8433	0.079308874	0.079308874	14.40511	13.70068
LinedPaper_Large	0	PilotStudyUpdate	OfficeSupplies	Large	293	400	0.348381575	0.331159483	0.320458942	1	132.561186	132.561186	73.54956	0.089163823	0.089163823	14.49731	13.68669
Locks_Large	0	PilotStudyUpdate	OfficeSupplies	Large	293	400	0.337997142	0.331969896	0.330032962	1	164.4624573	164.4624573	70.6	0.096331058	0.096331058	15.15198	14.37591
PaintBrushes_Large	0	PilotStudyUpdate	OfficeSupplies	Large	293	400	0.307021551	0.352855654	0.340122794	1	146.1815444	146.1815444	64.27966	0.110537543	0.110537543	15.14767	14.47328
Paint_Large	0	PilotStudyUpdate	OfficeSupplies	Large	293	400	0.339303276	0.333254937	0.327441787	1	152.8027218	152.8027218	62.58072	0.101919795	0.101919795	14.71206	13.90132
paperclips_Large	0	PilotStudyUpdate	OfficeSupplies	Large	293	400	0.326906765	0.340724926	0.33236831	1	149.234198	149.234198	62.56422	0.159726962	0.159726962	15.28843	14.63615
Pens_Large	0	PilotStudyUpdate	OfficeSupplies	Large	293	400	0.343709836	0.331434885	0.32485528	1	149.5004608	149.5004608	64.61092	0.083191126	0.083191126	14.95415	14.19991
Pencils_Large	0	PilotStudyUpdate	OfficeSupplies	Large	293	400	0.354854952	0.334468831	0.310676216	1	153.3857082	153.3857082	54.68761	0.070349829	0.070349829	14.72711	14.14588
StickyNotes_Large	0	PilotStudyUpdate	OfficeSupplies	Large	293	400	0.357480147	0.339471049	0.303048804	1	143.5772526	143.5772526	70.92884	0.068174061	0.068174061	14.2185	13.44493
Tape_Large	0	PilotStudyUpdate	OfficeSupplies	Large	293	400	0.359225813	0.344424471	0.296349716	1	150.7898976	150.7898976	62.24231	0.098890785	0.098890785	14.7182	13.9754
ThumbTacks_Large	0	PilotStudyUpdate	OfficeSupplies	Large	293	400	0.35160497	0.343940903	0.304454128	1	152.2784727	152.2784727	66.21818	0.099744027	0.099744027	15.00082	14.26396
String_Large	0	PilotStudyUpdate	OfficeSupplies	Large	293	400	0.341085369	0.331349375	0.327565256	1	138.5205034	138.5205034	62.4321	0.141083618	0.141083618	15.40608	14.57371
RubberBands_Large	0	PilotStudyUpdate	OfficeSupplies	Large	293	400	0.372465005	0.36218514	0.265349855	1	147.4613396	147.4613396	66.3494	0.08084471	0.08084471	14.51227	13.76595
Ruler_Large	0	PilotStudyUpdate	OfficeSupplies	Large	293	400	0.305155511	0.39000253	0.304841959	1	162.466442	162.466442	65.76078	0.085452218	0.085452218	14.59046	13.79098
BrownMarkers_Large	0	PilotStudyUpdate	OfficeSupplies	Large	293	400	0.347999877	0.335689339	0.316310784	1	150.5820478	150.5820478	66.38106	0.092491468	0.092491468	15.05859	14.22365
YellowMarkers_Large	0	PilotStudyUpdate	OfficeSupplies	Large	293	400	0.346826394	0.344036939	0.309136668	1	140.8059812	140.8059812	66.80556	0.08225256	0.08225256	14.72475	14.00622
Stapler_Large	0	PilotStudyUpdate	OfficeSupplies	Large	293	400	0.371449175	0.358473899	0.270076926	1	165.2292321	165.2292321	55.29266	0.114249147	0.114249147	14.50392	13.55524
Staples_Large	0	PilotStudyUpdate	OfficeSupplies	Large	293	400	0.341559764	0.340055729	0.318384506	1	155.4158703	155.4158703	64.11631	0.064675768	0.064675768	14.51923	13.67535
Folders_Larger	0	PilotStudyUpdate	OfficeSupplies	Large	293	400	0.36608313	0.345014343	0.288902528	1	131.9119454	131.9119454	68.97036	0.073976109	0.073976109	14.14372	13.32042
PushPins_Large	0	PilotStudyUpdate	OfficeSupplies	Large	293	400	0.360756823	0.344660358	0.294582819	1	143.6729949	143.6729949	64.10593	0.151706485	0.151706485	15.22261	14.44001
Locks_Small	0	PilotStudyUpdate	OfficeSupplies	Small	293	400	0.332860401	0.332546644	0.334592956	1	147.8657509	147.8657509	78.99518	0.059726962	0.059726962	15.10174	14.25441
PaintBrushes_Small	0	PilotStudyUpdate	OfficeSupplies	Small	293	400	0.319785259	0.34374464	0.3364701	1	140.282884	140.282884	66.84748	0.07862628	0.07862628	14.79716	14.08331
Paint_Small	0	PilotStudyUpdate	OfficeSupplies	Small	293	400	0.335638225	0.332288384	0.332073391	1	150.2109727	150.2109727	66.19641	0.075511945	0.075511945	14.70393	13.89826
Paperclips_Small	0	PilotStudyUpdate	OfficeSupplies	Small	293	400	0.33106735	0.331954476	0.336978175	1	150.8657423	150.8657423	64.76083	0.069283276	0.069283276	14.77208	14.05758
Pens_small	0	PilotStudyUpdate	OfficeSupplies	Small	293	400	0.337962975	0.331342762	0.330694263	1	149.3964249	149.3964249	64.79947	0.059044369	0.059044369	14.63533	13.89682
Pencils_Large	0	PilotStudyUpdate	OfficeSupplies	Small	293	400	0.357050249	0.337799366	0.305150385	1	151.2018515	151.2018515	57.50056	0.063865188	0.063865188	14.52486	13.86324
StickyNotes_Small	0	PilotStudyUpdate	OfficeSupplies	Small	293	400	0.35286081	0.337332674	0.309806517	1	140.0632594	140.0632594	73.14701	0.052773038	0.052773038	14.18589	13.46305
Tape_Small	0	PilotStudyUpdate	OfficeSupplies	Small	293	400	0.354891162	0.334635027	0.310473811	1	145.6376792	145.6376792	69.66858	0.06331058	0.06331058	14.21503	13.42979
ThumbTacks_Small	0	PilotStudyUpdate	OfficeSupplies	Small	293	400	0.339970876	0.336966574	0.323062551	1	142.9420222	142.9420222	69.34327	0.063182594	0.063182594	14.87445	14.15915
String_Small	0	PilotStudyUpdate	OfficeSupplies	Small	293	400	0.349844815	0.333265786	0.316889399	1	129.1067833	129.1067833	75.76042	0.059087031	0.059087031	14.35322	13.58007
RubberBands_Small	0	PilotStudyUpdate	OfficeSupplies	Small	293	400	0.339445909	0.339991442	0.32056265	1	145.4332509	145.4332509	66.95356	0.054095563	0.054095563	14.1759	13.41903
Ruler_Small	0	PilotStudyUpdate	OfficeSupplies	Small	293	400	0.318768644	0.362803366	0.31842799	1	149.6000256	149.6000256	64.25816	0.075682594	0.075682594	14.74264	14.03026
BrownMarkers_Small	0	PilotStudyUpdate	OfficeSupplies	Small	293	400	0.340606522	0.336522406	0.322871072	1	143.0220392	143.0220392	70.15632	0.070648464	0.070648464	14.93682	14.16139
YellowMarkers_Small	0	PilotStudyUpdate	OfficeSupplies	Small	293	400	0.33939646	0.339112349	0.321491192	1	136.4661519	136.4661519	68.62897	0.065230375	0.065230375	14.6346	13.92297
Stapler_Large	0	PilotStudyUpdate	OfficeSupplies	Small	293	400	0.356069555	0.350409392	0.293521053	1	153.0932509	153.0932509	62.03556	0.0875	0.0875	14.56932	13.73545
Staples_Small	0	PilotStudyUpdate	OfficeSupplies	Small	293	400	0.335840639	0.336614598	0.327544763	1	143.3484471	143.3484471	67.2321	0.05524744	0.05524744	14.37805	13.56673
Folders_Small	0	PilotStudyUpdate	OfficeSupplies	Small	293	400	0.360018078	0.340016372	0.29996555	1	130.2941297	130.2941297	74.66498	0.05746587	0.05746587	14.23415	13.39627
PushPins_Small	0	PilotStudyUpdate	OfficeSupplies	Small	293	400	0.343735202	0.338699172	0.317565626	1	136.4630375	136.4630375	69.65539	0.071288396	0.071288396	14.87369	14.15839
BinderClips_Small	0	PilotStudyUpdate	OfficeSupplies	Small	293	400	0.334055095	0.33035677	0.335588135	1	150.9843003	150.9843003	63.23965	0.052474403	0.052474403	14.45613	13.67098
Calculator_Small	0	PilotStudyUpdate	OfficeSupplies	Small	293	400	0.324283949	0.347816015	0.327900036	1	142.9631058	142.9631058	65.42403	0.082423208	0.082423208	14.91517	14.12623
Chalk_Small	0	PilotStudyUpdate	OfficeSupplies	Small	293	400	0.33474696	0.337306391	0.327946649	1	142.3800512	142.3800512	65.67572	0.044880546	0.044880546	14.46127	13.66605
CoinRolls_Small	0	PilotStudyUpdate	OfficeSupplies	Small	293	400	0.361540605	0.336837954	0.301621441	1	125.2228498	125.2228498	72.87563	0.093131399	0.093131399	14.94868	14.07337
Compass_Small	0	PilotStudyUpdate	OfficeSupplies	Small	293	400	0.329847934	0.33733138	0.332820686	1	152.8061263	152.8061263	64.23989	0.069923208	0.069923208	14.91873	14.15596
Scissors_Small	0	PilotStudyUpdate	OfficeSupplies	Small	293	400	0.345872564	0.335773832	0.318353604	1	152.7480461	152.7480461	63.24713	0.059598976	0.059598976	14.63652	13.91181
YellowPaperclips_Small	0	PilotStudyUpdate	OfficeSupplies	Small	293	400	0.358915347	0.337535578	0.303549075	1	147.1578925	147.1578925	66.90509	0.060622867	0.060622867	15.29497	14.57995
Erasers_Small	0	PilotStudyUpdate	OfficeSupplies	Small	293	400	0.337591435	0.33188689	0.330521675	1	137.5999403	137.5999403	69.86378	0.056697952	0.056697952	14.31979	13.54028
IndexCards_Small	0	PilotStudyUpdate	OfficeSupplies	Small	293	400	0.353460377	0.332972441	0.313567182	1	131.2873464	131.2873464	74.72789	0.040187713	0.040187713	14.34481	13.59236
Markers_Small	0	PilotStudyUpdate	OfficeSupplies	Small	293	400	0.352373806	0.336724017	0.310902177	1	155.7203754	155.7203754	65.82143	0.073037543	0.073037543	14.80448	13.99764
Notebook_Small	0	PilotStudyUpdate	OfficeSupplies	Small	293	400	0.357412105	0.336266887	0.306321008	1	140.2528584	140.2528584	69.56136	0.064633106	0.064633106	14.52731	13.84835
LinedPaper_Small	0	PilotStudyUpdate	OfficeSupplies	Small	293	400	0.354623621	0.33234416	0.313032219	1	129.7605375	129.7605375	74.73159	0.066254266	0.066254266	14.28448	13.57783
